# Supplementary figures and images for: Novel and rapid NH4HF2 assisted KH2PO4 fusion of pegmatite ores bearing refractory minerals for multi-element determination by atomic spectrometry
Source: Royal Society of Chemistry journal article supplement (doi:10.1039/d3ja00269a), 2024-01-01

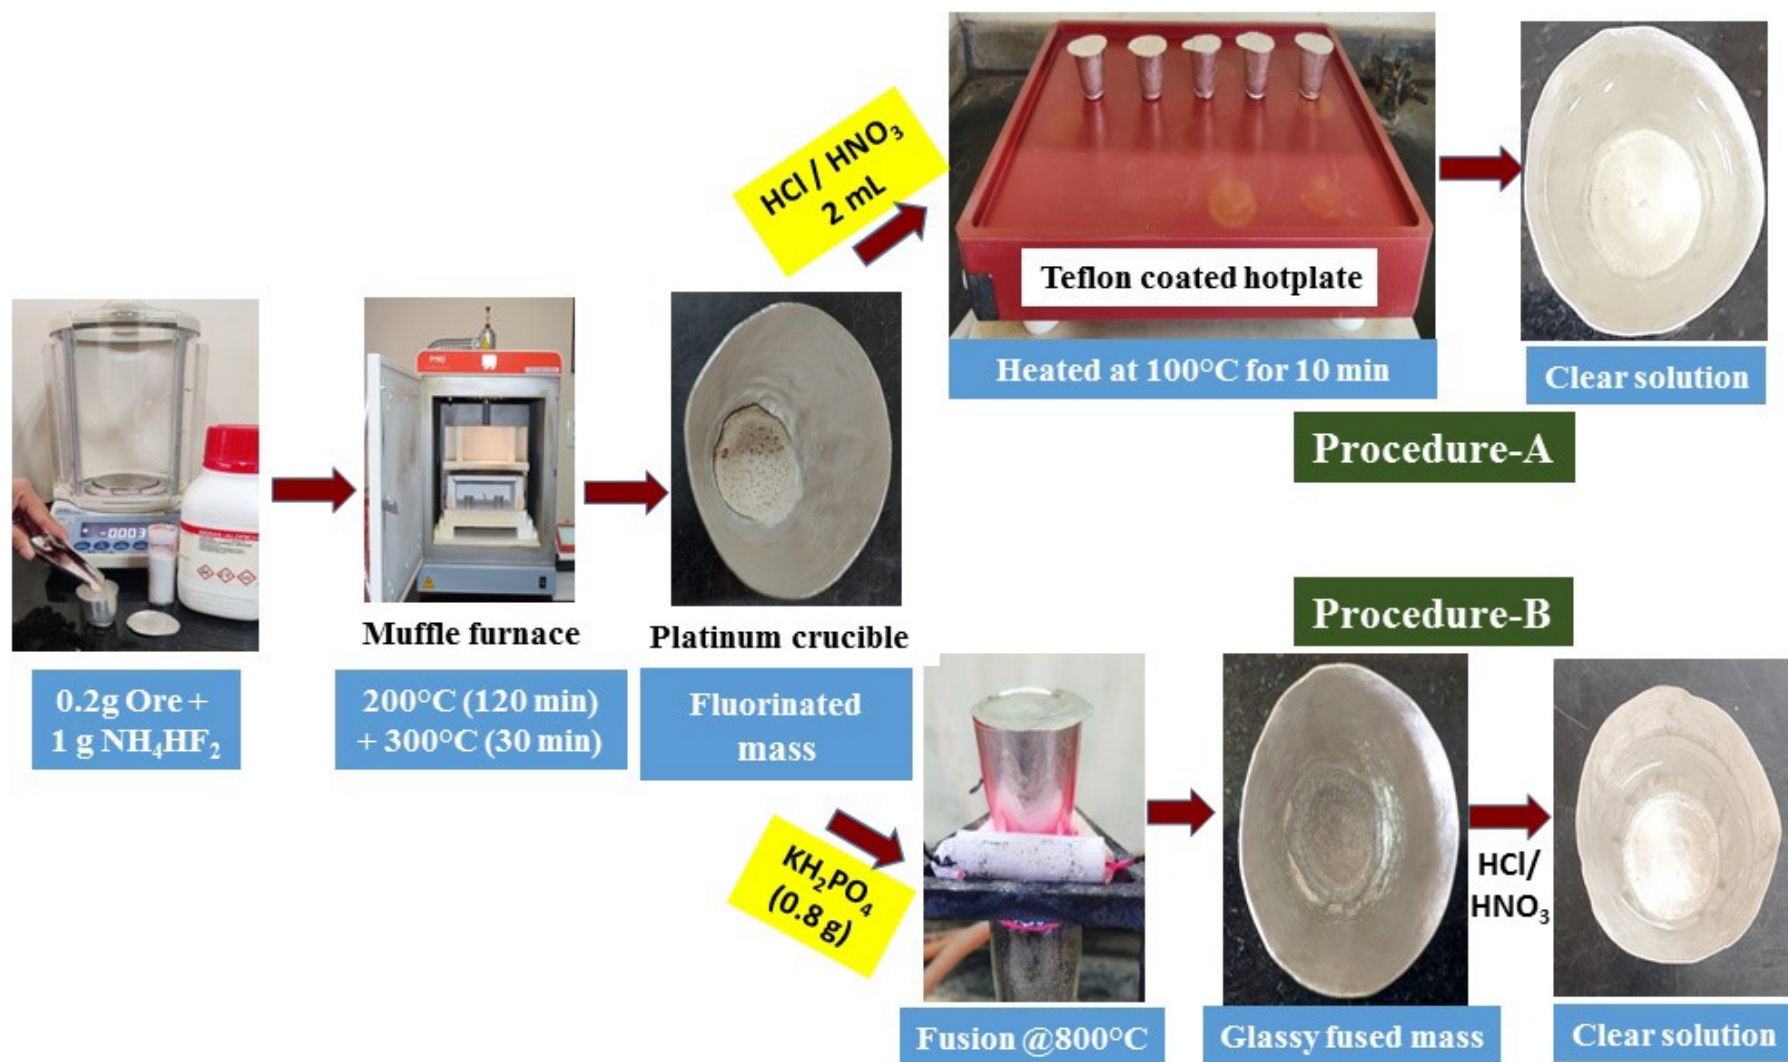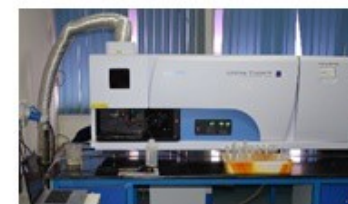

**ICP-OES**  
(Sn, W, Nb, Ta, Ti, Be,  
Fe, Ca, Mn)

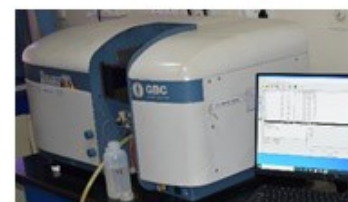

**Flame AAS**  
(Li, Rb & Cs)

Supplement: d3ja00269a1.pdf [file d3ja00269a1.pdf]
